# Supplementary material
Source: PubMed Central journal article supplement (PMC6839959)
Supplement: blood886317-suppl1.pdf [file blood886317-suppl1.pdf]

## **Resolvin D4 attenuates the severity of pathological thrombosis in mice**

Deya Cherpokova<sup>1,3†</sup>, Charlotte C. Jouvencé<sup>4†</sup>, Stephania Libreros<sup>4</sup>, Elise P. DeRoo<sup>1</sup>, Long Chu<sup>1</sup>, Xavier de la Rosa<sup>4</sup>, Paul C. Norris<sup>4</sup>, Denisa D. Wagner<sup>1-3\*</sup>, and Charles N. Serhan<sup>4\*</sup>

<sup>1</sup>Program in Cellular and Molecular Medicine, Boston Children's Hospital, Boston, MA 02115

<sup>2</sup>Division of Hematology/Oncology, Boston Children's Hospital, Boston, MA 02115

<sup>3</sup>Department of Pediatrics, Harvard Medical School, Boston, MA 02115

<sup>4</sup>Center for Experimental Therapeutics and Reperfusion Injury, Department of Anesthesiology, Perioperative and Pain Medicine, Brigham and Women's Hospital, Harvard Medical School, Boston, MA 02115, USA

†D.C. and C.C.J. contributed equally to this work.

\* Contributed equally. Correspondence: Prof. Charles N. Serhan, Center for Experimental Therapeutics and Reperfusion Injury, 60 Fenwood Road BTM 3-016, Boston, Massachusetts 02115, USA; phone: 1.617.525.5001; e-mail: cserhan@bwh.harvard.edu and Denisa D. Wagner, Program in Cellular and Molecular Medicine, Boston Children's Hospital, 1 Blackfan Circle, 9<sup>th</sup> Floor, Boston, MA 02115, USA; phone: 1.617.713.8300; e-mail denisa.wagner@childrens.harvard.edu

**Supplemental data**

## Supplemental Methods

### LM-SPM metabololipidomics

Plasma (200  $\mu$ L) and thrombi separated from the vessel wall were snap frozen after harvest. Due to the small net weight of each thrombus (< 15 mg), a pool of three was used for each experimental condition. Prior to lipid extraction, deuterium labeled internal standards including d8-5S-HETE, d5-RvD2, d5-LXA<sub>4</sub>, d4-LTB<sub>4</sub>, and d4-PGE<sub>2</sub> (500 pg each, Cayman Chemical) in 1 mL of ice-cold methanol were added to each sample for quantification and recovery of the LMs. Tissues were then gently dispersed with a glass Dounce and held at – 20 °C for 45 min to allow protein precipitation. After centrifugation at 1000 g for 10 min at 4 °C, supernatants were collected, and LMs were extracted according to optimized methods.<sup>1,2</sup> Briefly, samples were acidified to an apparent pH 3.5, loaded onto Isolute SPE 100 mg cartridges (Biotage), and rapidly neutralized with double-distilled water. Methyl formate, used to elute LMs, was brought to dryness under a gentle stream of nitrogen gas using the automated evaporation system (TurboVap LV, Biotage) and immediately resuspended in methanol-water mixture (50:50, v/v) for LC-MS/MS injections. The LC-MS/MS system consisted of a QTRAP 5500 (AB Sciex) equipped with a Shimadzu LC-20AD HPLC. A Poroshell 120 EC-C18 column (100 mm x 4.6 mm x 2.7  $\mu$ m; Agilent Technologies) was kept in a column oven regulated at 50 °C. LMs were eluted from this column in a gradient of methanol/water/acetic acid that increased from 55:45:0.01 (v/v/v) to 100:0:0.01 (v/v/v) at a flow rate of 0.5 mL/min. To monitor and quantify the LM amounts, targeted MRM (multiple reaction monitoring) and EPI (enhanced product ion) in a negative mode were used, and the limits of detection were  $\approx$  0.1 pg, as previously described.<sup>1,2</sup> Different criteria were used for identification, including MS-MS matching to at least

six diagnostic ion fragments per molecule, and a matching retention time to authentic and synthetic standards. Network pathway analysis of the docosahexaenoic acid (DHA), eicosapentaenoic acid (EPA), and arachidonic acid (AA) metabolome depicting relative levels of pathway markers and LMs in the thrombus before and after treatment was visualized using Cytoscape 3.6.1 software.<sup>3</sup>

### **Flow cytometry**

Thrombi were collected on day 8 from thrombus-bearing mice treated with vehicle or RvD4 (3 µg) IV via tail vein injection on day 1 and day 4 post IVC stenosis. Thrombi were washed with phosphate-buffered saline (PBS) containing Ca<sup>2+</sup> (0.9 mM) and Mg<sup>2+</sup> (0.5 mM) and then gently homogenized and passed through a 70-micron filter. Clot-derived cells were stained for flow cytometric analysis in FACS buffer (PBS with 1% BSA and 0.1% sodium azide). Fc-receptor-mediated, non-specific antibody binding was blocked by TruStain FcX anti-mouse CD16/CD32 antibody, which was followed by incubation with surface antibodies for APC-conjugated anti-mouse F4/80 (clone BM8), PercP-Cy5.5-conjugated anti-mouse CD45 (clone 30-F11), PE-conjugated anti-mouse CD11b (clone M1/70), APC Cy7-conjugated anti-mouse Ly6G (clone 1A8), PE Cy7-conjugated Ly6C (clone HK1.4), and FITC-conjugated anti-mouse CD3 (clone 17A2) (all from Biolegend). For viability assays, FITC-conjugated Annexin V (BD) and propidium iodide (PI) were added to the cells according to the manufacturer's protocol. Samples were analyzed with a FACS Canto II flow cytometer (BD Bioscience) and FlowJo X Software.

## Neutrophil isolation and NETosis assay

Mice were treated with vehicle (PBS + 0.1% of ethanol) or 3  $\mu\text{g}$  RvD4 IV via tail vein injection 24 hours prior to the experiment depicted in Figure 4E-F. Blood was collected in 1% (wt/v) BSA/15 mM EDTA in PBS. Blood cells were layered onto Percoll (GE Healthcare) gradients of 78%, 69%, and 52% in PBS, the interphase between 78% and 69% collected, and red blood cells lysed by the addition of a hypotonic solution. Neutrophils were resuspended in RPMI/HEPES and were allowed to adhere to plastic plates (CellBIND, Corning) at 37°C, 5% CO<sub>2</sub> for 30 minutes before stimulation with 4  $\mu\text{M}$  ionomycin (Invitrogen) for 4 hours. Cells were fixed in 2% (v/v) paraformaldehyde (Electron Microscopy Sciences). DNA was visualized with Hoechst-33342 (Invitrogen), and citrullinated histone 4 stained overnight with a rabbit anti-H4Cit antibody (0.8  $\mu\text{g}/\text{mL}$ , EMD Millipore). Images were acquired on a Zeiss Axiovert epifluorescence microscope. NETs were counted in six different fields in duplicate wells and expressed as percentage of NET-releasing neutrophils per total number of cells in the respective field. Mean NET release in the vehicle-treated group was set to 100% on each experimental day, and individual results in both groups normalized to this value.

For *in vitro* NETosis assays (supplemental Figure 5), blood was collected from naïve C57BL/6/J male mice and neutrophils were isolated utilizing a Percoll gradient as described above. Neutrophils were plated onto a 96-well plate and allowed to adhere for 30 minutes. Cells were incubated with vehicle or RvD4 (10 nM) for 15 minutes at 37°C and were subsequently left untreated or were stimulated with ionomycin for 4 hours, fixed, and stained as described above. NETs were counted in six different fields in duplicate wells and expressed as percentage of NET-releasing neutrophils per total number of cells in the respective field.

## Platelet isolation and aggregation studies

Mice were treated with vehicle or 3  $\mu\text{g}$  RvD4 IV via tail vein injection 24 hours prior to the experiment. Blood was collected in enoxaparin (0.2  $\mu\text{g}/\text{mL}$ ) under isoflurane anesthesia. Platelet-rich plasma (PRP) was collected after two centrifugation cycles of  $300 \times g$  for 7 minutes at RT. Aggregation on ADP stimulation was analyzed in PRP. All other aggregation studies were carried out with washed platelets. For this, PRP was pelleted at  $700 \times g$  in the presence of prostacyclin ( $\text{PGI}_2$ ) (0.1  $\mu\text{g}/\text{mL}$ ) and apyrase (0.02 U/mL). The platelet pellet was resuspended in modified Tyrode-HEPES buffer (134 mM NaCl, 0.34 mM  $\text{Na}_2\text{HPO}_4$ , 2.9 mM KCl, 12 mM  $\text{NaHCO}_3$ , 5 mM HEPES, 1 mM  $\text{MgCl}_2$ , 5 mM glucose, 0.35% BSA, pH 7.4) containing apyrase and left for 30 minutes at  $37^\circ\text{C}$  prior stimulation. Platelet suspensions (a total of  $8 \times 10^7$  platelets) in Tyrode-HEPES buffer supplemented with 2 mM  $\text{CaCl}_2$  were activated with the indicated agonists and light transmission was recorded for 20 minutes on a Chronolog platelet aggregometer.

## References

1. English JT, Norris PC, Hodges RR, Dartt DA, Serhan CN. Identification and Profiling of Specialized Pro-Resolving Mediators in Human Tears by Lipid Mediator Metabolomics. *Prostaglandins Leukot Essent Fatty Acids*. 2017;117:17-27.
2. Colas RA, Shinohara M, Dalli J, Chiang N, Serhan CN. Identification and signature profiles for pro-resolving and inflammatory lipid mediators in human tissue. *Am J Physiol Cell Physiol*. 2014;307(1):C39-54.
3. Shannon P, Markiel A, Ozier O, et al. Cytoscape: a software environment for integrated models of biomolecular interaction networks. *Genome Res*. 2003;13(11):2498-2504.

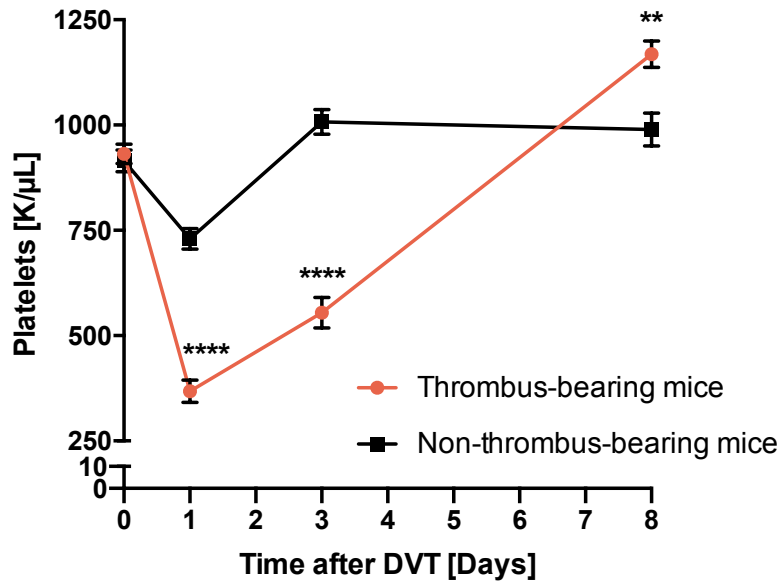

**Supplemental Figure 1. Peripheral platelet counts in thrombus-bearing mice at the indicated time points post IVC stenosis.** Peripheral platelet counts in male C57BL6/J mice were determined prior IVC stenosis (day 0) and during progression of deep vein thrombosis progression in thrombus-bearing mice (n = 17, thrombus-bearing mice), and in mice that underwent surgery, but without thrombus formation in the IVC (n = 12, non-thrombus-bearing mice). Thrombus presence in the IVC was confirmed by ultrasound imaging on day 1. \*\*  $P < 0.01$ , \*\*\*\*  $P < 0.0001$  thrombus versus no thrombus condition, unpaired two-tailed  $t$ -test.

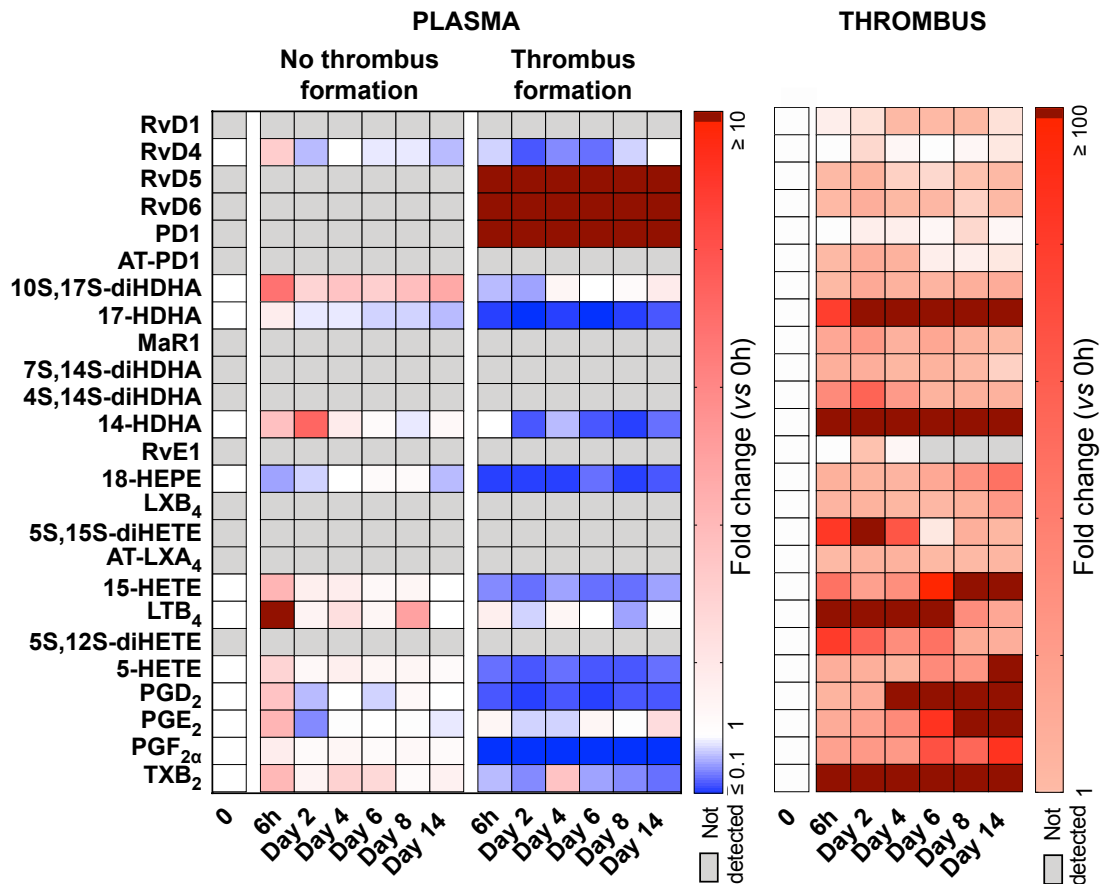

**Supplemental Figure 2. Different impact of DVT on SPM production in plasma and thrombus.** Heat map representation of the mean fold change in the abundances post IVC stenosis induction of the LM in the plasma of mice without a thrombus formation (n=3, left panel), and with a thrombus formation (n=3, middle panel) relative to those in the plasma of naïve mice (n=6, 0 hours). The right panel depicts the mean change of the LM in the thrombus during DVT progression (pool of 3 thrombi). Blue shades indicate a decrease, and red shades indicate an increase of the LM-SPM levels compared the time 0 hour.

### Specialized Pro-resolving Mediators

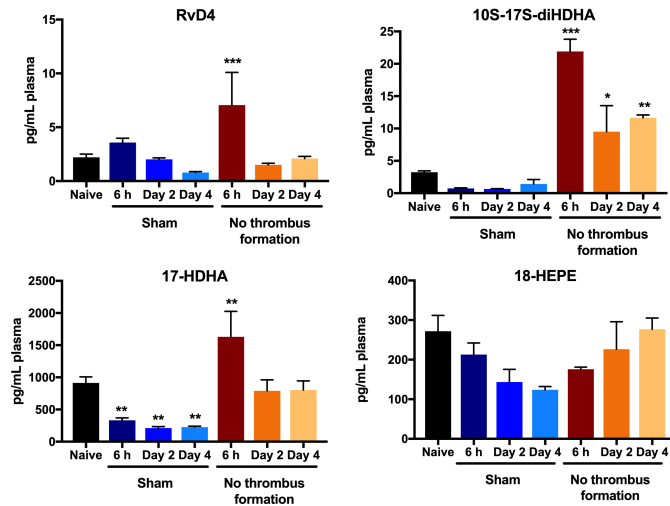

### Leukotrienes

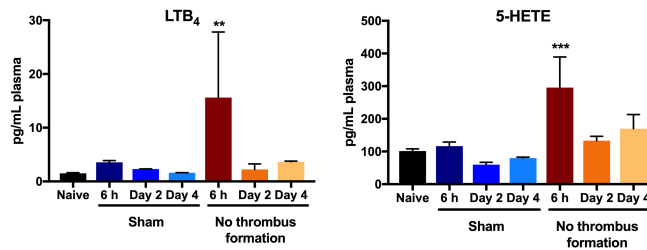

### Prostanoids

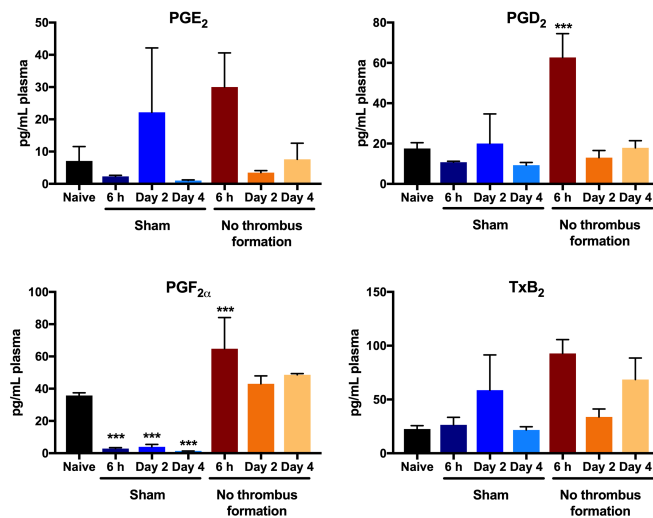

**Supplemental Figure 3. Impact of IVC stenosis on lipid mediators in mouse plasma.** Two hundred  $\mu\text{L}$  of plasma from naïve mice ( $n=6$ ), sham-operated mice (in which the suture was removed immediately after stenosis of the IVC,  $n=3$ ), and mice with the ligature, but without a thrombus formation ( $n=3$ ) were analyzed with LC-MS/MS. Results are mean  $\pm$  SEM, \*  $P < 0.05$ , \*\*  $P < 0.01$ , \*\*\*  $P < 0.001$  compared to naïve mice, one-way ANOVA with Dunnett's multiple comparisons test.





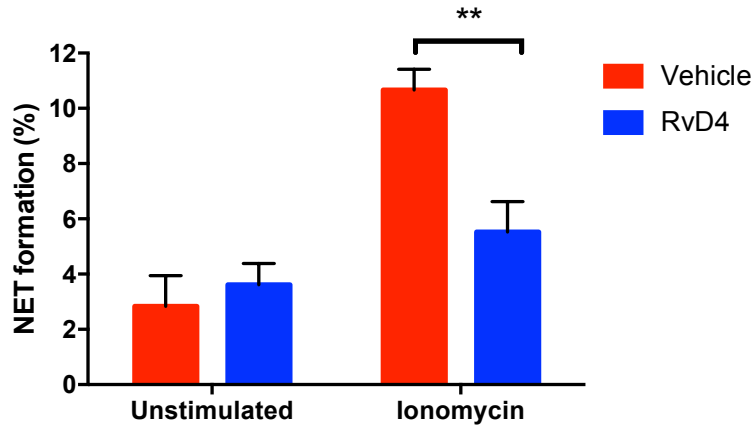

**Supplemental Figure 5. RvD4 dampens NET formation *in vitro*.** Neutrophils were plated onto a 96-well plate and allowed to adhere for 30 minutes. Cells were incubated with vehicle or RvD4 (10 nM) for 15 minutes at 37°C and were subsequently left untreated or were stimulated with ionomycin for 4 hours. Quantification of the percentage of NET-releasing cells (n=5). \*\*  $P < 0.01$ , unpaired two-tailed  $t$ -test.

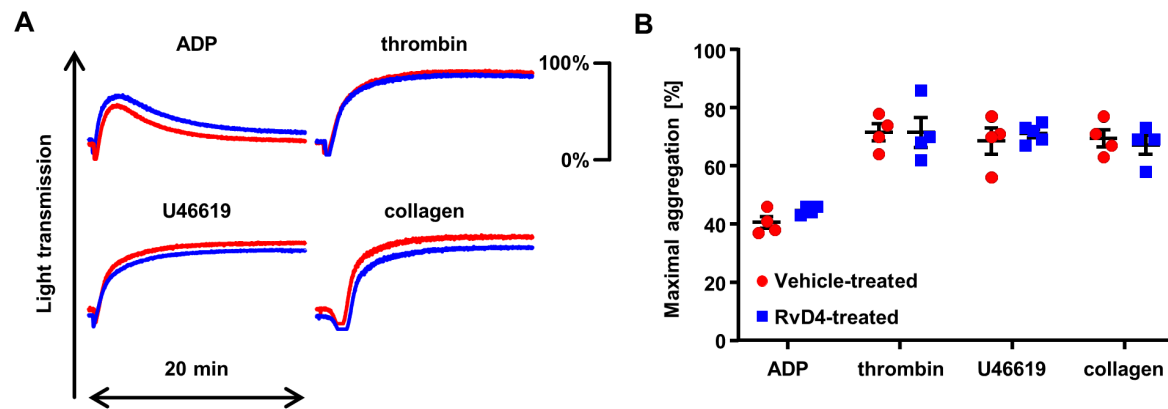

**Supplemental Figure 6. RvD4 does not affect platelet aggregation.** Platelets isolated from vehicle-treated (red line) or RvD4-treated (blue line) mice 24 hours after treatment were stimulated with the indicated agonists for 20 minutes. (A) Representative aggregation traces. (B) Maximal aggregation values (n = 4-5). No statistically significant differences were observed.

**Supplemental Table 1. Abbreviations**

| Full name                                       | Abbreviation                        | Chemical name                                                         |
|-------------------------------------------------|-------------------------------------|-----------------------------------------------------------------------|
| Docosahexaenoic acid                            | DHA                                 | 4Z,7Z,10Z,13Z,16Z,19Z-docosahexaenoic acid                            |
| 17-hydroxydocosahexaenoic acid                  | 17-HDHA                             | 17S-hydroxy-4Z,7Z,10Z,13Z,15E,19Z-docosahexaenoic acid                |
| Resolvin D1                                     | RvD1                                | 7S,8R,17S-trihydroxy-4Z,9E,11E,13Z,15E,19Z-docosahexaenoic acid       |
| Resolvin D2                                     | RvD2                                | 7S,16R,17S-trihydroxy-4Z,8E,10Z,12E,14E,19Z-docosahexaenoic acid      |
| Resolvin D3                                     | RvD3                                | 4S,11R,17S-trihydroxy-5Z,7E,9E,13Z,15E,19Z-docosahexaenoic acid       |
| Resolvin D4                                     | RvD4                                | 4S,5R,17S-trihydroxy-6E,8E,10Z,13Z,15E,19Z-docosahexaenoic acid       |
| Resolvin D5                                     | RvD5                                | 7S,17S-dihydroxy-4Z,8E,10Z,13Z,15Z,19E-docosahexaenoic acid           |
| Resolvin D6                                     | RvD6                                | 4S,17S-dihydroxy-5E,7E,10Z,13Z,15E,19Z-docosahexaenoic acid           |
| Protectin D1                                    | PD1                                 | 10R,17S-dihydroxy-4Z,7Z,11E,13E,15Z,19Z-docosahexaenoic acid          |
| Protectin DX                                    | PDX                                 | 10S,17S-dihydroxy-4Z,7Z,11E,13Z,15E,19Z-docosahexaenoic acid          |
| 14-hydroxydocosahexaenoic acid                  | 14-HDHA                             | 14S-hydroxy-4Z,7Z,10Z,12E,16Z,19Z-docosahexaenoic acid                |
| Maresin 1                                       | MaR1                                | 7R,14S-dihydroxy-4Z,8E,10E,12Z,16Z,19Z-DHA                            |
| 7S,14S-dihydroxydocosahexaenoic acid            | 7S,14S-diHDHA                       | 7S,14S-dihydroxy-4Z,8E,10Z,12E,16Z,19Z-docosahexaenoic acid           |
| 4S,14S-dihydroxydocosahexaenoic acid            | 4S,14S-diHDHA                       | 4S,14S-dihydroxy-5E,7Z,10Z,12E,16Z,19Z-docosahexaenoic acid           |
| Eicosapentaenoic acid                           | EPA                                 | 5Z,8Z,11Z,14Z,17Z-eicosapentaenoic acid                               |
| 18-hydroxyeicosapentaenoic acid                 | 18-HEPE                             | 18-hydroxy-5Z,8Z,11Z,14Z,16E-eicosapentaenoic acid                    |
| Resolvin E1                                     | RvE1                                | 5S,12R,18R-trihydroxy-6Z,8E,10E,14Z,16E-eicosapentaenoic acid         |
| Resolvin E2                                     | RvE2                                | 5S,18R-dihydroxy-6E,8Z,11Z,14Z,16E-eicosapentaenoic acid              |
| Resolvin E3                                     | RvE3                                | 17R,18R-dihydroxy-5Z,8Z,11Z,13E,15E-eicosapentaenoic acid             |
| 15-hydroxyeicosapentaenoic acid                 | 15-HEPE                             | 15-hydroxy-5Z,8Z,11Z,13E,17Z-eicosapentaenoic acid                    |
| 12-hydroxyeicosapentaenoic acid                 | 12-HEPE                             | 12-hydroxy-5Z,8Z,10E,14Z,17Z-eicosapentaenoic acid                    |
| 5-hydroxyeicosapentaenoic acid                  | 5-HEPE                              | 5-hydroxy-6E,8Z,11Z,14Z,17Z-eicosapentaenoic acid                     |
| Arachidonic acid                                | AA                                  | 5Z,8Z,11Z,14Z-eicosatetraenoic acid                                   |
| 5-hydroxyeicosatetraenoic acid                  | 5-HETE                              | 5S-hydroxy-6E,8Z,11Z,14Z-eicosatetraenoic acid                        |
| Leukotriene A <sub>4</sub>                      | LTA <sub>4</sub>                    | 5S,6S-epoxy-7E,9E,11Z,14Z-eicosatetraenoic acid                       |
| Leukotriene B <sub>4</sub>                      | LTB <sub>4</sub>                    | 5S,12R-dihydroxy-6Z,8E,10E,14Z-eicosatetraenoic acid                  |
| 20-hydroxy-leukotriene B <sub>4</sub>           | 20-OH-LTB <sub>4</sub>              | 5S,12R,20-trihydroxy-6Z,8E,10E,14Z-eicosatetraenoic acid              |
| 5S,12S-dihydroxyeicosatetraenoic acid           | 5S,12S-diHETE                       | 5S,12S-dihydroxy-6E,8Z,10E,14Z-eicosatetraenoic acid                  |
| 15-hydroxyeicosatetraenoic acid                 | 15-HETE                             | 15-hydroxy-5Z,8Z,11Z,13E-eicosatetraenoic acid                        |
| Lipoxin A <sub>4</sub>                          | LXA <sub>4</sub>                    | 5S,6R,15S-trihydroxy-7E,9E,11Z,13E-eicosatetraenoic acid              |
| Lipoxin B <sub>4</sub>                          | LXB <sub>4</sub>                    | 5S,14R,15S-trihydroxy-6E,8Z,10E,12E-eicosatetraenoic acid             |
| 5S,15S-dihydroxyeicosatetraenoic acid           | 5S,15S-diHETE                       | 5S,15S-dihydroxy-6E,8Z,11Z,13E-eicosatetraenoic acid                  |
| Aspirin-triggered lipoxin A <sub>4</sub>        | AT-LXA <sub>4</sub>                 | 5S,6R,15R-trihydroxy-7E,9E,11Z,13E-eicosatetraenoic acid              |
| Aspirin-triggered lipoxin B <sub>4</sub>        | AT-LXB <sub>4</sub>                 | 5S,14R,15R-trihydroxy-6E,8Z,10E,12E-eicosatetraenoic acid             |
| 12-hydroxyeicosatetraenoic acid                 | 12-HETE                             | 12S-hydroxy-5Z,8Z,10E,14Z-eicosatetraenoic acid                       |
| Prostaglandin D <sub>2</sub>                    | PGD <sub>2</sub>                    | 9 $\alpha$ ,15S-dihydroxy-11-oxo-prosta-5Z,13E-dien-1-oic acid        |
| Prostaglandin E <sub>2</sub>                    | PGE <sub>2</sub>                    | 9-oxo-11 $\alpha$ ,15S-dihydroxy-prosta-5Z,13E-dien-1-oic acid        |
| Prostaglandin F <sub>2<math>\alpha</math></sub> | PGF <sub>2<math>\alpha</math></sub> | 9 $\alpha$ ,11 $\alpha$ ,15S-trihydroxy-prosta-5Z,13E-dien-1-oic acid |
| Thromboxane A <sub>2</sub>                      | TXA <sub>2</sub>                    | 9S,11S-epoxy,15S-hydroxy-thromboxa-5Z,13E-dien-1-oic acid             |
| Thromboxane B <sub>2</sub>                      | TXB <sub>2</sub>                    | 9S,11,15S-trihydroxy-thromboxa-5Z,13E-dien-1-oic acid                 |

**Supplemental Table 2. Mouse thrombus lipid mediators quantitation during DVT**

| <b>Lipid Mediators</b> | <b>6 hours</b> | <b>Day 2</b> | <b>Day 4</b> | <b>Day 6</b> | <b>Day 8</b> | <b>Day 14</b> |
|------------------------|----------------|--------------|--------------|--------------|--------------|---------------|
| <b>SPM</b>             |                |              |              |              |              |               |
| RvD1                   | 0.3            | 0.5          | 1.1          | 1.0          | 1.7          | 0.5           |
| RvD2                   | -              | -            | -            | -            | -            | -             |
| RvD3                   | -              | -            | -            | -            | -            | -             |
| RvD4                   | 0.1            | 0.6          | 0.2          | 0.1          | 0.2          | 0.4           |
| RvD5                   | 1.5            | 5.5          | 0.7          | 0.6          | 0.9          | 1.1           |
| RvD6                   | 1.0            | 8.5          | 1.8          | 2.2          | 0.7          | 1.4           |
| PD1                    | 0.1            | 0.3          | 0.3          | 0.2          | 0.6          | 0.2           |
| AT-PD1                 | 1.4            | 10.0         | 5.8          | 0.3          | 0.3          | 0.4           |
| 10S,17S-diHDHA         | 1.9            | 12.6         | 5.7          | 4.4          | 7.9          | 9.8           |
| 17-HDHA                | 78.6           | 143.3        | 107.5        | 266.5        | 137.3        | 250.9         |
| MaR1                   | 13.4           | 22.7         | 6.3          | 14.2         | 5.6          | 1.8           |
| 4S,14S-diHDHA          | 32.4           | 55.8         | 22.2         | 5.6          | 6.6          | 5.9           |
| 7S,14S-diHDHA          | 7.6            | 8.3          | 3.1          | 5.5          | 1.5          | 0.7           |
| 14-HDHA                | 896.9          | 1491.4       | 811.0        | 2186.0       | 368.7        | 358.5         |
| RvE1                   | 0.1            | 0.9          | 0.2          | -            | -            | -             |
| 18-HEPE                | 7.1            | 5.1          | 4.0          | 13.0         | 27.8         | 47.1          |
| 12-HEPE                | 1857.2         | 1027.8       | 856.0        | 1878.1       | 538.1        | 160.1         |
| LXA <sub>4</sub>       | -              | -            | -            | -            | -            | -             |
| LXB <sub>4</sub>       | 4.3            | 5.4          | 2.9          | 2.3          | 7.0          | 23.8          |
| AT-LXA <sub>4</sub>    | 1.3            | 5.9          | 5.7          | 1.7          | 1.6          | 3.6           |
| 5,15-diHETE            | 82.1           | 103.2        | 65.0         | 0.4          | 7.7          | 2.6           |
| 15-HETE                | 47.5           | 17.8         | 29.8         | 98.6         | 102.1        | 289.8         |
| 12-HETE                | 1384.0         | 1150.2       | 890.0        | 1596.1       | 160.4        | 389.1         |
| <b>Eicosanoids</b>     |                |              |              |              |              |               |
| LTB <sub>4</sub>       | 163.1          | 367.9        | 160.7        | 160.6        | 30.2         | 13.4          |
| 5S,12S-diHETE          | 80.2           | 56.6         | 31.2         | 47.2         | 11.4         | 9.1           |
| 5-HETE                 | 8.3            | 7.8          | 4.7          | 32.4         | 25.1         | 103.3         |
| PGD <sub>2</sub>       | 4.7            | 11.3         | 110.1        | 659.8        | 664.6        | 1605.1        |
| PGE <sub>2</sub>       | 11.0           | 17.0         | 33.0         | 86.1         | 129.8        | 194.9         |
| PGF <sub>2α</sub>      | 17.4           | 23.1         | 23.5         | 67.2         | 54.5         | 86.5          |
| TXB <sub>2</sub>       | 716.1          | 272.8        | 280.4        | 1009.5       | 540.9        | 658.6         |

Results expressed in pg of LMs/10 mg of thrombus. - = not detected, limit of detection (0.1 pg). See Methods and text for details. Data are representative of a pool of 3 thrombi.

**Supplemental Table 3. Mouse plasma lipid mediators quantitation during DVT**

| Lipid Mediators     | Naive        | No thrombus formation |                 |                |                |                |                | Thrombus formation |                  |                 |                  |                  |                 |
|---------------------|--------------|-----------------------|-----------------|----------------|----------------|----------------|----------------|--------------------|------------------|-----------------|------------------|------------------|-----------------|
|                     | 0h           | 6 hours               | Day 2           | Day 4          | Day 6          | Day 8          | Day 14         | 6 hours            | Day 2            | Day 4           | Day 6            | Day 8            | Day 14          |
| <b>SPM</b>          |              |                       |                 |                |                |                |                |                    |                  |                 |                  |                  |                 |
| RvD1                | -            | -                     | -               | -              | -              | -              | -              | -                  | -                | -               | -                | -                | -               |
| RvD2                | -            | -                     | -               | -              | -              | -              | -              | -                  | -                | -               | -                | -                | -               |
| RvD3                | -            | -                     | -               | -              | -              | -              | -              | -                  | -                | -               | -                | -                | -               |
| RvD4                | 2.2 ± 0.3    | 7.1 ± 3.1 *           | 1.5 ± 0.2       | 2.1 ± 0.2      | 2.0 ± 0.3      | 2.0 ± 0.3      | 1.6 ± 0.3      | 1.7 ± 0.1          | 0.7 ± 0.1 **     | 1.1 ± 0.3       | 0.8 ± 0.2 *      | 1.8 ± 0.3        | 2.1 ± 0.3       |
| RvD5                | -            | -                     | -               | -              | -              | -              | -              | 0.4 ± 0.1*         | 0.5 ± 0.0 ***    | 1.4 ± 0.4 *     | 1.1 ± 0.2 *      | 1.5 ± 0.4 *      | 1.6 ± 0.2 ***   |
| RvD6                | -            | -                     | -               | -              | -              | -              | -              | 1.2 ± 0.1 ***      | 0.5 ± 0.1 *      | 1.0 ± 0.1 ***   | 0.6 ± 0.1 **     | 0.7 ± 0.1 *      | 1.0 ± 0.3 *     |
| PD1                 | -            | -                     | -               | -              | -              | -              | -              | 0.2 ± 0.0 ***      | 0.1 ± 0.0 *      | 0.2 ± 0.1 *     | 0.2 ± 0.1 *      | 0.3 ± 0.1 **     | 0.3 ± 0.1 **    |
| AT-PD1              | -            | -                     | -               | -              | -              | -              | -              | -                  | -                | -               | -                | -                | -               |
| 10S,17S-diHDHA      | 3.2 ± 0.2    | 21.9 ± 1.9 ***        | 9.5 ± 4.0       | 11.7 ± 0.5 *** | 9.9 ± 4.0 *    | 12.3 ± 4.4 *   | 15.1 ± 1.3 *** | 2.2 ± 0.3 *        | 2.1 ± 0.4 *      | 4.5 ± 0.7 *     | 3.3 ± 0.4        | 3.8 ± 0.4        | 6.2 ± 0.6 ***   |
| 17-HDHA             | 914.5 ± 92.3 | 1630.0 ± 396.5 *      | 791.3 ± 169.2   | 802.2 ± 143.5  | 687.0 ± 75.4   | 692.2 ± 33.7   | 675.1 ± 101.5  | 204.4 ± 7.0 **     | 130.9 ± 23.5 *** | 192.8 ± 49.7 ** | 133.0 ± 14.8 *** | 162.5 ± 23.6 *** | 257.7 ± 8.2 **  |
| MaR1                | -            | -                     | -               | -              | -              | -              | -              | -                  | -                | -               | -                | -                | -               |
| 4S,14S-diHDHA       | -            | -                     | -               | -              | -              | -              | -              | -                  | -                | -               | -                | -                | -               |
| 7S,14S-diHDHA       | -            | -                     | -               | -              | -              | -              | -              | -                  | -                | -               | -                | -                | -               |
| 14-HDHA             | 333.5 ± 31.3 | 1242.0 ± 623.4 *      | 2430.0 ± 2028.0 | 633.1 ± 1.6 ** | 411.6 ± 14.9   | 290.6 ± 21.5   | 446.5 ± 104.9  | 328.1 ± 4.0 **     | 109.0 ± 21.8     | 220.0 ± 97.2    | 96.5 ± 14.0 **   | 63.2 ± 10.6 ***  | 125.6 ± 12.2 ** |
| RvE1                | -            | -                     | -               | -              | -              | -              | -              | -                  | -                | -               | -                | -                | -               |
| 18-HEPE             | 271.8 ± 40.1 | 175.7 ± 5.5           | 226.5 ± 69.5    | 276.9 ± 28.3   | 313.9 ± 72.4   | 324.1 ± 168.4  | 190.5 ± 34.8   | 41.7 ± 2.1 *       | 51.8 ± 7.2 **    | 58.0 ± 17.0 *   | 104.4 ± 16.9 *   | 54.4 ± 1.1 **    | 92.0 ± 29.2 *   |
| LXA <sub>4</sub>    | -            | -                     | -               | -              | -              | -              | -              | -                  | -                | -               | -                | -                | -               |
| LXB <sub>4</sub>    | -            | -                     | -               | -              | -              | -              | -              | -                  | -                | -               | -                | -                | -               |
| AT-LXA <sub>4</sub> | -            | -                     | -               | -              | -              | -              | -              | -                  | -                | -               | -                | -                | -               |
| 5,15-diHETE         | -            | -                     | -               | -              | -              | -              | -              | -                  | -                | -               | -                | -                | -               |
| 15-HETE             | 44.1 ± 3.0   | 185.5 ± 48.9 ***      | 76.5 ± 11.8 **  | 81.3 ± 2.9 *** | 55.5 ± 1.3 *   | 60.5 ± 9.1     | 45.1 ± 6.7     | 22.3 ± 0.4 **      | 15.5 ± 2.6 ***   | 24.4 ± 7.7 *    | 18.1 ± 0.7 ***   | 15.7 ± 2.5 ***   | 24.7 ± 0.8 **   |
| <b>Eicosanoids</b>  |              |                       |                 |                |                |                |                |                    |                  |                 |                  |                  |                 |
| LTB <sub>4</sub>    | 1.5 ± 0.1    | 15.6 ± 12.2 *         | 2.2 ± 1.0       | 3.7 ± 0.2 ***  | 2.1 ± 0.5      | 7.5 ± 5.0      | 1.5 ± 0.4      | 2.5 ± 0.3 *        | 1.3 ± 0.2        | 2.1 ± 0.6       | 1.4 ± 0.1        | 1.0 ± 0.3        | 1.6 ± 0.1       |
| 5S,12S-diHETE       | -            | -                     | -               | -              | -              | -              | -              | -                  | -                | -               | -                | -                | -               |
| 5-HETE              | 101.4 ± 6.9  | 295.8 ± 93.5 **       | 133.1 ± 13.4    | 169.8 ± 43.3 * | 141.1 ± 2.6 ** | 147.0 ± 6.0 ** | 120.9 ± 19.1   | 42.9 ± 9.9 **      | 27.5 ± 3.5 ***   | 36.9 ± 1.0 **   | 28.2 ± 3.0 ***   | 35.3 ± 4.2 ***   | 45.3 ± 4.0 **   |
| PGD <sub>2</sub>    | 17.6 ± 2.9   | 62.7 ± 11.8 **        | 13.0 ± 3.6      | 17.9 ± 3.5     | 14.7 ± 0.4     | 23.1 ± 8.5     | 18.2 ± 5.6     | 6.2 ± 1.3          | 2.9 ± 0.4 **     | 5.3 ± 2.3       | 4.0 ± 0.9 *      | 4.9 ± 1.2 *      | 4.9 ± 0.6 *     |
| PGE <sub>2</sub>    | 7.1 ± 4.5    | 30.0 ± 10.6           | 3.5 ± 0.6       | 7.6 ± 5.0      | 7.0 ± 2.9      | 7.9 ± 6.0      | 6.5 ± 4.3      | 10.2 ± 0.7         | 5.8 ± 0.6        | 5.6 ± 0.2       | 9.7 ± 3.6        | 7.9 ± 4.4        | 17.8 ± 5.7      |
| PGF <sub>2α</sub>   | 35.8 ± 1.6   | 64.8 ± 19.4 *         | 43.1 ± 4.9      | 48.7 ± 0.8 **  | 41.9 ± 0.9 *   | 46.5 ± 5.1*    | 43.0 ± 4.7     | 2.3 ± 0.1 ***      | 2.6 ± 0.5 ***    | 4.3 ± 1.9 ***   | 2.6 ± 0.2 ***    | 3.3 ± 0.3 ***    | 4.5 ± 0.2 ***   |
| TXB <sub>2</sub>    | 22.6 ± 3.0   | 92.8 ± 13.0 ***       | 33.8 ± 7.4      | 68.6 ± 20.1 ** | 60.5 ± 10.0 ** | 26.5 ± 7.6     | 35.2 ± 3.8 *   | 16.3 ± 4.7         | 10.2 ± 2.3 *     | 81.6 ± 71.1     | 13.7 ± 3.9       | 11.4 ± 3.7       | 9.9 ± 1.6 *     |

Results expressed in pg of LMs/mL of plasma. - = not detected, limit of detection (0.1 pg). See Methods and text for details. Data are mean ± SEM (n = 3 mice without thrombus formation and n = 3 mice with thrombus formation, n = 6 naïve mice). *t*-test versus naïve mice, \* *p* < 0.05, \*\* *p* < 0.01, \*\*\* *p* < 0.001.
